# Supplementary material
Source: publisher site journal article supplement (https://www.spandidos-publications.com/4880/downloadSupplementary)

Figure S1. Rg1 treatment decreases the expression of Beclin1 in APP/PS1 mice (magnification, x400; scale bar, 40  $\mu$ m). (A) The expression of Beclin1 in the cortex and hippocampus CA1. (B) The mean density Beclin1 in cortex. (C) The mean density Beclin1 in CA1. Results are expressed as the mean  $\pm$  SD (n=4). \*P<0.05 and \*\*P<0.01 vs. the WT-9M group; ##P<0.01 vs. the APP/PS1-9M group. Rg1, Ginsenoside Rg1.

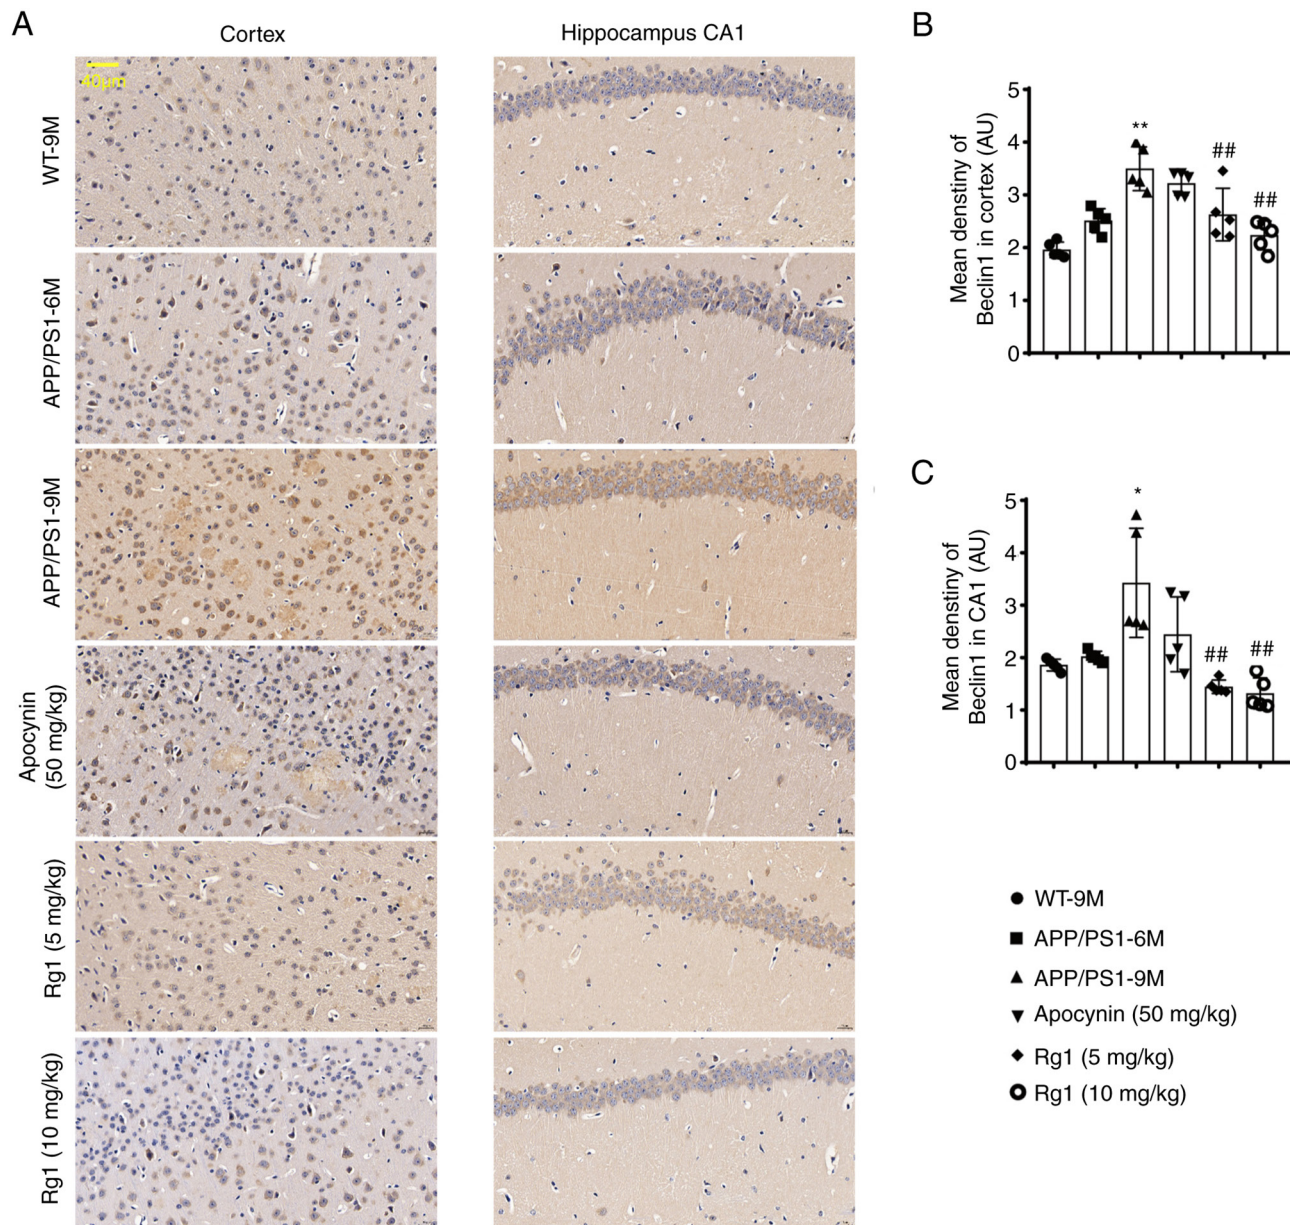

Figure S2. Rg1 treatment decreases the expression of LC3 in APP/PS1 mice (magnification, x400; scale bar, 40  $\mu$ m). (A) The expression of LC3 in the cortex and hippocampus CA1. (B) The mean density LC3 in cortex. (C) The mean density LC3 in CA1. Results are expressed as the mean  $\pm$  SD (n=4). \*\*P<0.01 vs. the WT-9M group; #P<0.05 and ##P<0.01 vs. the APP/PS1-9M group. Rg1, Ginsenoside Rg1.

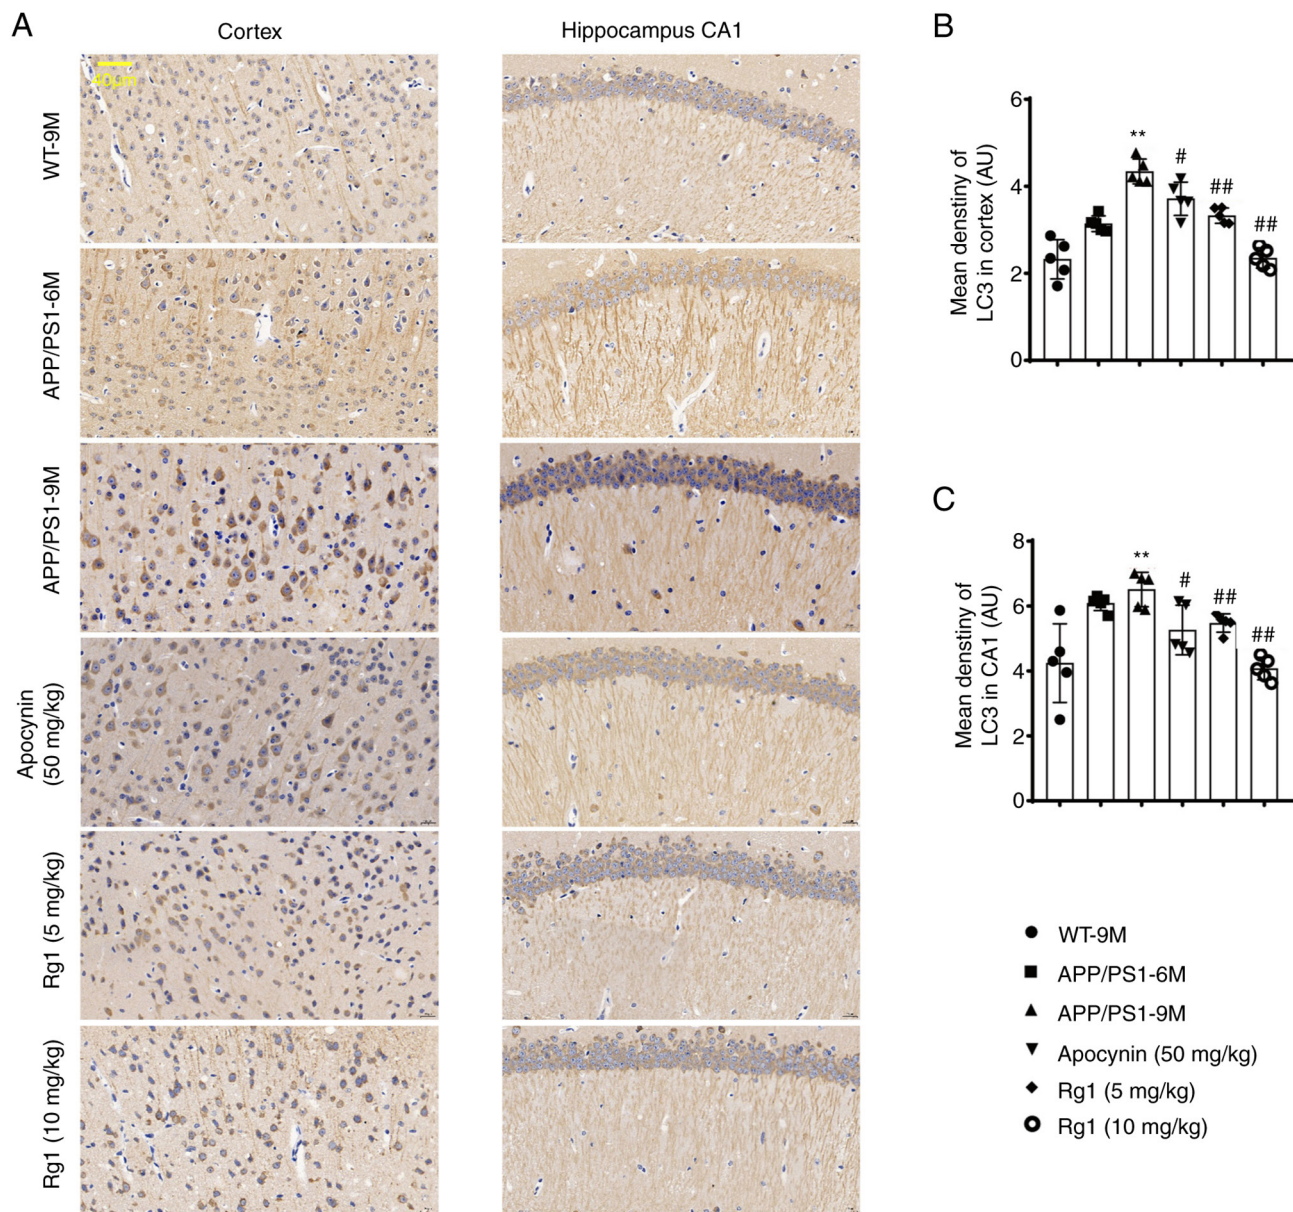

Figure S3. Molecular docking results of Rg1 and NLRP1. (A) The cartoon form. (B) The surface form. (C) The detailed binding site and hydrogen bonds. Rg1, Ginsenoside Rg1.

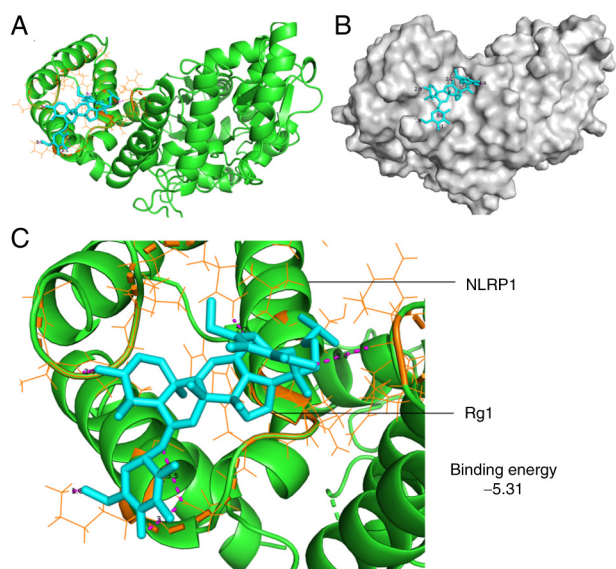

Supplement: Supplementary file 1 [file downloadSupplementary]
